# Supplementary material for: Real-World Experience of Pembrolizumab Monotherapy in Patients with Recurrent or Persistent Cervical Cancer: A Korean Multi-Center Retrospective Study (KGOG1041)
Source: PubMed Central journal article supplement (PMC7693862; doi:10.3390/cancers12113188), 2020-10-29
Supplement: cancers-12-03188-s001.pdf [file cancers-12-03188-s001.pdf]

Article

# Real-world experience of pembrolizumab monotherapy in patients with recurrent or persistent cervical cancer: A Korean multi-center retrospective study (KGOG1041)

Min Chul Choi, Yong-Man Kim, Jeong-Won Lee, Yong Jae Lee, Dong Hoon Suh, Sung Jong Lee, Taek Sang Lee, Maria Lee, Dong Choon Park, Min Kyu Kim, Jong-Min Lee, Seung-Hyuk Shim, Seob Jeon, Kyung Jin Min, Mi Kyung Kim, Bo Wook Kim, Jeong Yeol Park, Byoung-Gie Kim, Dae Yeon Kim, Moon-Hong Kim, Hyun-Soo Kim and Jung-Yun Lee

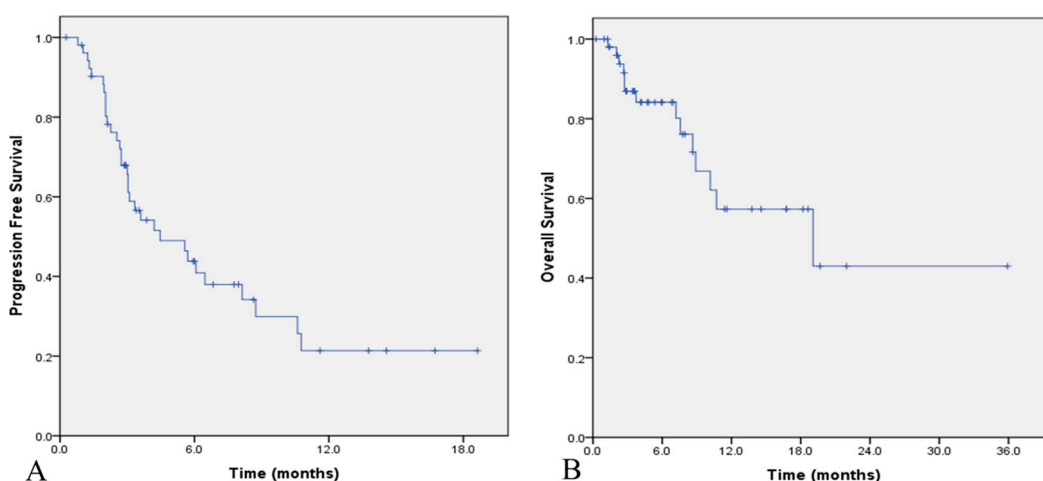

**Figure S1.** Kaplan-Meier estimates of survival in the favorable performance status group ( $n = 53$ ). (A) Progression-free survival, (B) Overall survival.

**Table S1.** Participating institutions ( $n = 16$ ).

| Institution                                                    | Number of patients |
|----------------------------------------------------------------|--------------------|
| Catholic Kwandong University International St. Mary's Hospital | 2                  |
| Konkuk University Medical Center                               | 2                  |
| Korea University Ansan Medical Center                          | 2                  |
| Soonchunhyang University Hospital                              | 2                  |
| Ewha Womans University Mokdong Hospital                        | 1                  |
| Kyung Hee University Hospital at Gangdong                      | 1                  |
| Samsung Changwon Hospital                                      | 3                  |
| St. Vincent's Hospital                                         | 4                  |
| Seoul National University Hospital                             | 5                  |
| SMG-SNU Boramae Medical Center                                 | 5                  |
| Seoul St. Mary's Hospital                                      | 7                  |
| Seoul National University Bundang Hospital                     | 7                  |
| Yonsei University Severance Hospital                           | 9                  |
| CHA Bundang Medical Center                                     | 18                 |
| Asan Medical Center                                            | 19                 |
| Samsung Medical Center                                         | 30                 |
| Total                                                          | 117                |

Table S2 Clinical summary of patients whose best overall response was complete or partial response (n = 11).

| Case     | Age | HPV | Histology | ECOG PS | No of lines of prior CTx | PD-L1 exp* | Cycles of pembrolizumab | BOR | Time to response(Mo) | DOR(Mo) | Current status      |
|----------|-----|-----|-----------|---------|--------------------------|------------|-------------------------|-----|----------------------|---------|---------------------|
| KDKH001  | 63  | +   | Squamous  | 1       | 2                        | N/A        | #16 ongoing             | CR  | 5.9                  | 7.7     | CR                  |
| SCH001   | 69  | +   | Squamous  | 0       | 1                        | N/A        | #12 ongoing             | CR  | 3.3                  | 8.2     | CR                  |
| BCHA008  | 72  | N/A | Squamous  | 1       | 2                        | 100%       | #13                     | CR  | 1.9                  | 14.6    | CR                  |
| SNUBH003 | 43  | N/A | Squamous  | 0       | 5                        | N/A        | #19 ongoing             | PR  | 13.1                 | 1.2     | AWD                 |
| SMC026   | 54  | -   | Squamous  | 1       | 1                        | 30         | #9 ongoing              | PR  | 1.9                  | 4.8     | AWD                 |
| AMC017   | 49  | N/A | Squamous  | 0       | 1                        | 20         | #8 ongoing              | PR  | 5.8                  | 2.8     | AWD                 |
| AMC018   | 57  | +   | Squamous  | 0       | 3                        | N/A        | #7 ongoing              | PR  | 5.4                  | 2.7     | AWD                 |
| BCHA006  | 57  | +   | Squamous  | 3       | 2                        | 90%        | #24 ongoing             | PR  | 1.5                  | 19.6    | CR <sup>&amp;</sup> |
| BCHA013  | 46  | +   | Adenosq   | 0       | 4                        | 17         | #9 ongoing              | PR  | 1.3                  | 4.6     | AWD                 |
| BRM001   | 42  | N/A | Squamous  | 0       | 2                        | 5%         | #15                     | PR  | 2.8                  | 7.7     | AWD                 |
| BCHA010  | 52  | +   | Squamous  | 1       | 3                        | 10%        | #18                     | PR  | 1.9                  | 1.7     | Expired             |

HPV, human papillomavirus; ECOG PS, Eastern Cooperative Oncology Group performance status; CTx, chemotherapy; PD-L1 exp, expression of programmed death ligand 1; BOR, best overall response; Mo, months; DOR, duration of response; N/A, non-available; Squamous, squamous cell carcinoma; Adenosq, adenosquamous cell carcinoma; CR, complete response; PR, partial response; AWD, alive with disease. \* expression of PD-L1 as determined by either tumor proportion score (TPS) or combined positive score (CPS) <sup>&</sup> after confirming a partial response of -90%, performed anterior pelvic exenteration after the 11<sup>th</sup> cycle of treatment to repair a vesico-uterine fistula. The patient stayed in complete response during the 24<sup>th</sup> cycle of treatment after the operation.

**Table S3.** Tumor responses in patients with squamous cell carcinoma histology ( $n = 88$ ).

| <b>Anti-tumor activity</b>    | <b><math>n = 88</math></b> |
|-------------------------------|----------------------------|
| Best overall response         |                            |
| CR                            | 3 (3.4%)                   |
| PR                            | 7 (8.0%)                   |
| SD                            | 22 (25.0%)                 |
| PD                            | 47 (53.4%)                 |
| Not able to be assessed       | 9 (10.2%)                  |
| Objective response rate       |                            |
| 95% CI                        | 5.6 to 19.9                |
| Disease control rate          |                            |
| 95% CI                        | 26.4 to 47.3               |
| Time to response, months      |                            |
| Median (range)                | 3.0 (1.3–13.1)             |
| Duration of response, months  |                            |
| Median (range)                | NR                         |
| Duration of response, months* |                            |
| ≥6                            | 6 (60%)                    |
| ≥9                            | 4 (40%)                    |
| ≥12                           | 2 (20%)                    |

CR, complete response; PR, partial response; SD, stable disease; PD, progressive disease; CI, confidence interval; NR, not reached. \* Percentages as a fraction of the number of responders.
